# Supplementary material
Source: PubMed Central journal article supplement (PMC3193432)
Supplement: cr2010141x2.pdf [file cr2010141x2.pdf]

## Supplementary Figure S2

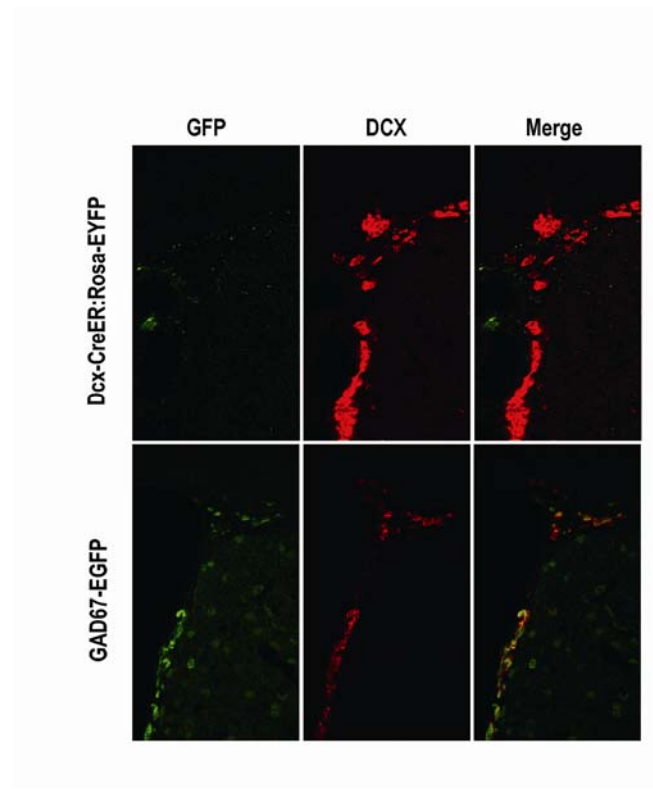

**Figure S2** YFP is not expressed in newborn neurons of the subventricular in adult Dcx-CreER:Rosa26-EYFP mice. No YFP (green, upper panels) immuno-labeling was observed in the SVZ, despite the high number of DCX+ neurons in this region (red). A GAD67-EGFP knockin mouse was used as a positive control for anti-GFP immunolabeling of newborn neurons in the SVZ (green, lower panels).
