# Supplementary material
Source: PubMed Central journal article supplement (PMC3193432)
Supplement: cr2010141x3.pdf [file cr2010141x3.pdf]

## Supplementary Figure S3

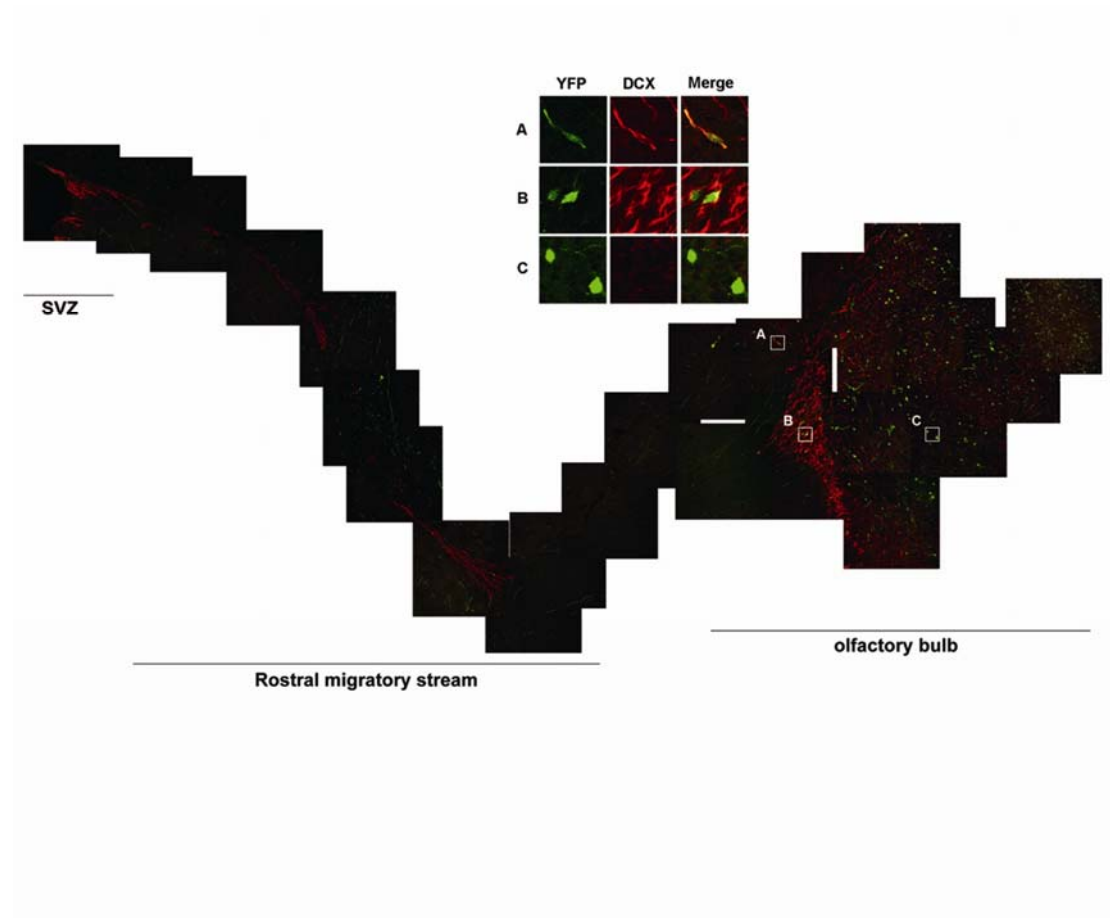

**Figure S3** YFP expression and co-immunostaining with DCX in rostral migratory stream (RMS) and olfactory bulb. Mice were analyzed five days after tamoxifen induction. Sagittal slices (30  $\mu\text{m}$ ) were immuno-stained with GFP (green) and DCX antibodies (red). A very small number of YFP<sup>+</sup> cells were observed along entire RMS, whereas many were located in the olfactory bulb. In olfactory bulb, cells adjacent to the RMS co-localized with DCX (box A and B), whereas cells in GCL did not express DCX (box C).
