# Supplementary material
Source: PubMed Central journal article supplement (PMC3193432)
Supplement: cr2010141x6.pdf [file cr2010141x6.pdf]

## Supplementary Figure S6

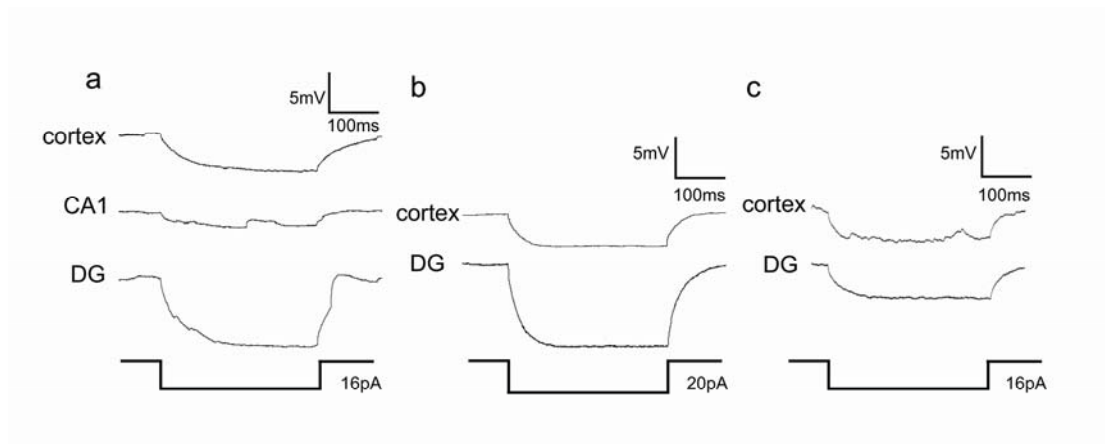

**Figure S6** Comparison of voltage changes evoked by current pulses. **(a)** Adult mouse (C57/B6L, 8 weeks, male) neurons recorded from the indicated brain regions. Experiments are performed by Lab A. **(b)** Adult mouse neurons recorded from the indicated brain regions. Experiments are performed by Lab B using a different patch clamp and recording apparatus. **(c)** Adult rat (SD rat, 8 weeks, male) neurons recorded by Lab A from the indicated brain regions.
