# Supplementary material
Source: PubMed Central journal article supplement (PMC3193432)
Supplement: cr2010141x7.pdf [file cr2010141x7.pdf]

## Supplementary Table S1

| Cell     | Mouse |       | Rat   |
|----------|-------|-------|-------|
|          | Lab A | Lab B |       |
| 1        | 545.0 | 597   | 265.6 |
| 2        | 478.1 | 468   | 323.8 |
| 3        | 623.8 | 406   | 316.9 |
| 4        |       | 511   | 333.7 |
| 5        |       | 457   | 311.3 |
| averaged | 549.0 | 487.8 | 310.3 |

**Table S1** Calculated input resistance of granule neurons in adult mouse or rat DG by current clamp recording. The input resistance was determined by measuring the voltage change at the end of 300-400 ms current pulses leading to 5-10 mV hyperpolarization. Granule cell  $R_{in}$  was calculated in mouse brains using two separate sets of equipment from Lab A and B. The recording setup was described in the method section.
